# Supplementary material
Source: Springer Nature journal article supplement (https://www.springermedizin.de/resource/supplementary/12990_2008_167_MOESM1_ESM.pdf/9612710)
Supplement: MOESM1 [file 9612710]

| Samples | House-keeping Genes |       |       |       | Genes of interest |       |       |       |
|---------|---------------------|-------|-------|-------|-------------------|-------|-------|-------|
|         | Act-B               | Gapdh | Hprt1 | hCyPB | TRPV1             | TRPV2 | TRPV3 | TRPV4 |
| ♀1      | 14.75               | 18.5  | 23.05 | 20.71 | 28.82             | 24.41 | 30.87 | 30.2  |
| ♀2      | 15.02               | 19.04 | 23.83 | 21.3  | 29.02             | 25.83 | 30.79 | 30.89 |
| ♀3      | 15.7                | 19.31 | 23.85 | 21.93 | 29.18             | 25.72 | 31.86 | 29.76 |
| ♀4      | 14.71               | 18.77 | 23.21 | 21.02 | 28.63             | 24.68 | 32.44 | 30.77 |
| ♀5      | 14.95               | 18.83 | 23.31 | 21.23 | 29.05             | 24.99 | 32.5  | 29.65 |
| ♀6      | 14.77               | 18.35 | 22.85 | 21.24 | 29.44             | 25.33 | 31.66 | 31    |
| ♀7      | 15.81               | 19.57 | 24.29 | 21.92 | 30.33             | 26.61 | 33.4  | 32.56 |
| ♀8      | 14.7                | 18.95 | 23.43 | 21.01 | 30.35             | 25    | 31.92 | 30.52 |
| ♀9      | 14.94               | 19    | 23.64 | 21.55 | 29.93             | 25.51 | 32.89 | 30.14 |
| ♀10     | 14.84               | 18.82 | 23.55 | 20.83 | 29.92             | 25.03 | 33.56 | 30.05 |
| ♀11     | 15                  | 19    | 23.64 | 21.43 | 30.04             | 24.96 | 31.11 | 30.62 |
| ♀12     | 14.66               | 18.64 | 23.35 | 21.08 | 30                | 24.58 | 32.59 | 30.75 |
| ♀13     | 15.65               | 19.24 | 24.01 | 21.71 | 30.29             | 26.88 | 34.12 | 31.2  |
| ♀14     | 15.01               | 18.96 | 23.8  | 21.32 | 29.01             | 25.53 | 30.78 | 30.82 |
| ♀15     | 14.91               | 19.02 | 23.7  | 21.55 | 29.88             | 25.44 | 32.85 | 30.08 |
| ♂1      | 15.15               | 18.99 | 23.6  | 21.16 | 31.33             | 24.88 | 33.52 | 31.97 |
| ♂2      | 14.42               | 18.27 | 23.25 | 20.78 | 30.96             | 25.27 | 33.77 | 29.73 |
| ♂3      | 14.63               | 18.66 | 23.36 | 21.02 | 29.4              | 24.85 | 31.71 | 30.61 |
| ♂4      | 14.94               | 19.26 | 23.49 | 21.31 | 31.16             | 25.13 | 32.14 | 32.87 |
| ♂5      | 14.81               | 18.85 | 23.26 | 21.01 | 30.33             | 24.75 | 31.77 | 31.41 |
| ♂6      | 14.6                | 18.84 | 23.05 | 20.93 | 28.22             | 24.76 | 30.42 | 30.44 |
| ♂7      | 15.2                | 19.25 | 23.72 | 21.23 | 29.18             | 25.66 | 32.87 | 30.83 |
| ♂8      | 14.63               | 18.63 | 23.15 | 20.79 | 29.15             | 24.78 | 29.72 | 31.09 |

|             |       |       |       |       |       |       |       |       |
|-------------|-------|-------|-------|-------|-------|-------|-------|-------|
| ♂ <b>9</b>  | 14.88 | 19.02 | 24.26 | 21.71 | 30.02 | 25.87 | 33.83 | 31.38 |
| ♂ <b>10</b> | 14.87 | 18.75 | 23.51 | 21.3  | 30.51 | 25.68 | 33.47 | 31.59 |
| ♂ <b>11</b> | 14.5  | 18.52 | 22.99 | 20.75 | 27.8  | 28.49 | 30.04 | 30.5  |
| ♂ <b>12</b> | 14.94 | 19.05 | 23.34 | 21.13 | 32.29 | 25.69 | 32.78 | 31.16 |
| ♂ <b>13</b> | 14.62 | 18.25 | 23.53 | 21.11 | 29.65 | 24.92 | 33.09 | 30.16 |
| ♂ <b>14</b> | 14.85 | 18.74 | 23.17 | 21.27 | 29.46 | 24.7  | 31.52 | 31.61 |
| ♂ <b>15</b> | 15.26 | 19.11 | 23.89 | 21.65 | 29.13 | 25.25 | 29.97 | 31.38 |
| *♀ <b>1</b> | 15.01 | 19.27 | 23.95 | 21.51 | 28.75 | 25.12 | 30.6  | 30.97 |
| *♀ <b>2</b> | 15.23 | 19.42 | 23.84 | 21.59 | 29.27 | 25.77 | 33.79 | 30.18 |
| *♀ <b>3</b> | 15.85 | 19.31 | 23.98 | 22    | 29.81 | 26.5  | 33.41 | 31.67 |
| *♂ <b>1</b> | 15.03 | 18.73 | 23.87 | 20.99 | 28.88 | 25.89 | 30.65 | 29.87 |
| *♂ <b>2</b> | 15.69 | 19.3  | 23.77 | 21.16 | 28.96 | 25.63 | 30.92 | 30.06 |
| Minimum Ct  | 14.42 | 18.25 | 22.85 | 20.71 | 27.8  | 24.41 | 29.72 | 29.65 |
| Maximum Ct  | 15.85 | 19.57 | 24.29 | 22    | 32.29 | 28.49 | 34.12 | 32.87 |
